# Supplementary material for: Rapid quantification of starch molecular order through multivariate modelling of13C CP/MAS NMR spectra
Source: Royal Society of Chemistry journal article supplement (doi:10.1039/c5cc06144j), 2015-01-01
Supplement: c5cc06144j2.xlsx [file c5cc06144j2.xlsx]

## Sheet: paste xy nmr data
PPM	Intensity								1. Collect of minimum of 1000 spectra
48.005	61.384			Answer	26.2632	% A/B order			2. Reference spectra to external adamantane
48.1061	60.8912								3. Fourier transform
48.2072	62.4064								4. Phase correction
48.3083	66.1687								5. If necessary baseline correction may be performed
48.4094	74.088								6. Spectra must be zerofilled to 4000 data points
48.5104	82.0353								7. Line broadeneing is set to 20Hz
48.6115	89.7711								8. C2,3,5 peak is set to 71.274ppm
48.7126	95.9221								9. Paste xy data 48-120ppm (chemical shift vs intensity)
48.8137	100.783								10. Percenatge A or B type molecular order value appears!
48.9148	104.531
49.0159	106.542
49.117	109.004
49.2181	112.751
49.3192	119.054
49.4203	127.585
49.5213	136.024
49.6224	143.762
49.7235	149.603
49.8246	154.602
49.9257	158.775
50.0268	161.206
50.1279	165.795
50.229	172.386
50.3301	182.092
50.4311	189.191
50.5322	194.099
50.6333	195.702
50.7344	195.97
50.8355	194.879
50.9366	191.681
51.0377	188.782
51.1388	188.347
51.2399	191.507
51.341	198.375
51.442	205.779
51.5431	213.432
51.6442	218.878
51.7453	223.393
51.8464	227.293
51.9475	231.513
52.0486	234.799
52.1497	237.809
52.2508	241.438
52.3518	247.219
52.4529	253.898
52.554	261.11
52.6551	265.782
52.7562	268.536
52.8573	269.075
52.9584	269.628
53.0595	270.566
53.1606	271.914
53.2617	273.643
53.3627	275.652
53.4638	277.611
53.5649	277.916
53.666	277.048
53.7671	276.291
53.8682	277.903
53.9693	283.592
54.0704	291.557
54.1715	301.805
54.2726	314.1
54.3736	327.468
54.4747	341.924
54.5758	356.175
54.6769	370.064
54.778	383.613
54.8791	397.648
54.9802	411.38
55.0813	424.59
55.1824	435.759
55.2834	445.307
55.3845	453.86
55.4856	461.646
55.5867	471.973
55.6878	485.286
55.7889	503.461
55.89	523.321
55.9911	541.491
56.0922	556.765
56.1933	569.752
56.2943	584.424
56.3954	601.163
56.4965	623.249
56.5976	648.249
56.6987	676.393
56.7998	711.696
56.9009	753.402
57.002	799.238
57.1031	848.846
57.2042	900.471
57.3052	955.028
57.4063	1014.66
57.5074	1086.83
57.6085	1166.74
57.7096	1255
57.8107	1351.05
57.9118	1450.87
58.0129	1554.5
58.114	1667.34
58.215	1786.63
58.3161	1911.31
58.4172	2041.63
58.5183	2174.34
58.6194	2309.8
58.7205	2450.88
58.8216	2596.63
58.9227	2743.7
59.0238	2890.62
59.1249	3032.3
59.2259	3169.1
59.327	3300.02
59.4281	3419.9
59.5292	3533.52
59.6303	3641.19
59.7314	3744.4
59.8325	3848.91
59.9336	3954.52
60.0347	4061.38
60.1358	4165.59
60.2368	4266.65
60.3379	4361.14
60.439	4443.74
60.5401	4514.6
60.6412	4567.71
60.7423	4587.69
60.8434	4581.82
60.9445	4546.04
61.0456	4459.82
61.1466	4347.28
61.2477	4209.39
61.3488	4041.45
61.4499	3867.27
61.551	3688.68
61.6521	3509.79
61.7532	3334.45
61.8543	3162.28
61.9554	2995.26
62.0565	2834.37
62.1575	2678.68
62.2586	2530.28
62.3597	2392.41
62.4608	2262.42
62.5619	2141.41
62.663	2034.2
62.7641	1932.87
62.8652	1837.04
62.9663	1747.12
63.0674	1660.12
63.1684	1576.11
63.2695	1498.1
63.3706	1428.51
63.4717	1366.3
63.5728	1315.87
63.6739	1273.53
63.775	1235.21
63.8761	1200.36
63.9772	1166.33
64.0782	1133.47
64.1793	1102.11
64.2804	1075.63
64.3815	1051.93
64.4826	1031.01
64.5837	1015.02
64.6848	1001.35
64.7859	990.101
64.887	984.111
64.9881	983.563
65.0891	987.26
65.1902	996.748
65.2913	1011.47
65.3924	1028.11
65.4935	1045.57
65.5946	1061.03
65.6957	1077.91
65.7968	1097.28
65.8979	1126.87
65.9989	1161.34
66.1	1200.37
66.2011	1243.19
66.3022	1288.31
66.4033	1336.19
66.5044	1391.52
66.6055	1455.68
66.7066	1526.33
66.8077	1605.05
66.9088	1684.88
67.0098	1764.29
67.1109	1842.08
67.212	1922.18
67.3131	2006.99
67.4142	2098.06
67.5153	2204.58
67.6164	2319.4
67.7175	2442.48
67.8186	2580.1
67.9197	2730.01
68.0207	2891.88
68.1218	3075.59
68.2229	3280.44
68.324	3504.61
68.4251	3760.78
68.5262	4054.88
68.6273	4375.05
68.7284	4727.12
68.8295	5113.58
68.9305	5517.13
69.0316	5937.49
69.1327	6371.69
69.2338	6809.26
69.3349	7250.04
69.436	7700.65
69.5371	8159.93
69.6382	8626.11
69.7393	9098.24
69.8404	9569.06
69.9414	10037.1
70.0425	10498
70.1436	10945.3
70.2447	11379.9
70.3458	11795.9
70.4469	12178.7
70.548	12535.8
70.6491	12863.6
70.7502	13135.9
70.8513	13373.3
70.9523	13575.2
71.0534	13708.3
71.1545	13796.2
71.2556	13842.1
71.3567	13820.3
71.4578	13748.5
71.5589	13640.3
71.66	13487.5
71.7611	13301.4
71.8621	13097.3
71.9632	12875.4
72.0643	12644
72.1654	12410.7
72.2665	12176.6
72.3676	11948.6
72.4687	11726.4
72.5698	11510.4
72.6709	11307.3
72.772	11113
72.873	10925.8
72.9741	10746.9
73.0752	10571.4
73.1763	10398.4
73.2774	10228.2
73.3785	10060
73.4796	9891.91
73.5807	9723
73.6818	9548.03
73.7829	9364.42
73.8839	9169.87
73.985	8947.37
74.0861	8709.53
74.1872	8456.46
74.2883	8177.94
74.3894	7883.3
74.4905	7574.89
74.5916	7249.23
74.6927	6917.38
74.7937	6581.74
74.8948	6242.89
74.9959	5904.43
75.097	5569.49
75.1981	5241.68
75.2992	4931.44
75.4003	4635.33
75.5014	4355.42
75.6025	4101.42
75.7036	3861.13
75.8046	3634.64
75.9057	3434.73
76.0068	3251.31
76.1079	3081.95
76.209	2930.26
76.3101	2789.31
76.4112	2657.88
76.5123	2541.74
76.6134	2441.02
76.7145	2348.87
76.8155	2265.42
76.9166	2190.24
77.0177	2120.14
77.1188	2055.44
77.2199	1996.3
77.321	1938.73
77.4221	1882.86
77.5232	1833.79
77.6243	1790.76
77.7253	1753.24
77.8264	1724.25
77.9275	1700.32
78.0286	1680.24
78.1297	1665.28
78.2308	1658.1
78.3319	1655.63
78.433	1658.35
78.5341	1664.98
78.6352	1674.36
78.7362	1686.78
78.8373	1704.53
78.9384	1724.92
79.0395	1747.73
79.1406	1771.97
79.2417	1794.72
79.3428	1816.64
79.4439	1839.55
79.545	1866.44
79.646	1895.84
79.7471	1927.62
79.8482	1958.42
79.9493	1987.75
80.0504	2014.62
80.1515	2037.7
80.2526	2058.27
80.3537	2076.12
80.4548	2086.3
80.5559	2091.08
80.6569	2090.54
80.758	2083.29
80.8591	2073.5
80.9602	2061.22
81.0613	2044.22
81.1624	2021.38
81.2635	1993.93
81.3646	1959.98
81.4657	1920.97
81.5668	1880.04
81.6678	1838.03
81.7689	1796.43
81.87	1753.45
81.9711	1708.49
82.0722	1657.66
82.1733	1605.03
82.2744	1550.92
82.3755	1497.78
82.4766	1445.32
82.5776	1393.22
82.6787	1340.53
82.7798	1288.21
82.8809	1237.04
82.982	1189.07
83.0831	1142.25
83.1842	1094.98
83.2853	1046.13
83.3864	995.633
83.4875	944.35
83.5885	892.315
83.6896	841.806
83.7907	794.512
83.8918	750.684
83.9929	714.191
84.094	680.785
84.1951	649.641
84.2962	619.763
84.3973	589.732
84.4984	559.945
84.5994	531.158
84.7005	504.769
84.8016	479.562
84.9027	455.412
85.0038	430.378
85.1049	405.801
85.206	382.028
85.3071	363.026
85.4082	344.651
85.5092	326.523
85.6103	305.279
85.7114	283.412
85.8125	261.717
85.9136	243.37
86.0147	228.418
86.1158	215.609
86.2169	204.847
86.318	195.761
86.4191	187.483
86.5201	179.913
86.6212	174.332
86.7223	170.609
86.8234	169.054
86.9245	169.726
87.0256	170.653
87.1267	171.686
87.2278	171.68
87.3289	169.979
87.43	166.606
87.531	160.042
87.6321	152.084
87.7332	143.28
87.8343	133.737
87.9354	125.131
88.0365	118.181
88.1376	114.059
88.2387	112.501
88.3398	111.637
88.4408	111.228
88.5419	111.477
88.643	110.97
88.7441	109.579
88.8452	105.839
88.9463	102.929
89.0474	100.912
89.1485	100.88
89.2496	97.471
89.3507	90.8848
89.4517	78.9485
89.5528	67.8535
89.6539	59.6738
89.755	56.9
89.8561	61.0155
89.9572	67.1723
90.0583	74.8018
90.1594	81.4441
90.2605	86.5692
90.3615	90.111
90.4626	90.8223
90.5637	91.0246
90.6648	91.3931
90.7659	94.569
90.867	99.6617
90.9681	106.166
91.0692	114.475
91.1703	128.327
91.2714	145.238
91.3724	165.276
91.4735	184.592
91.5746	202.593
91.6757	218.942
91.7768	233.078
91.8779	248.219
91.979	264.878
92.0801	289.417
92.1812	320.271
92.2823	356.445
92.3833	399.412
92.4844	442.851
92.5855	485.667
92.6866	525.901
92.7877	563.81
92.8888	598.573
92.9899	628.304
93.091	649.739
93.1921	667.276
93.2931	681.078
93.3942	688.449
93.4953	692.602
93.5964	693.929
93.6975	695.384
93.7986	698.173
93.8997	701.893
94.0008	705.985
94.1019	711.442
94.203	718.674
94.304	729.584
94.4051	743.036
94.5062	757.474
94.6073	772.525
94.7084	786.821
94.8095	800.085
94.9106	812.096
95.0117	825.171
95.1128	840.363
95.2139	857.723
95.3149	878.403
95.416	900.588
95.5171	924.386
95.6182	951.719
95.7193	980.624
95.8204	1009.57
95.9215	1036.55
96.0226	1060.63
96.1237	1083.84
96.2247	1106.87
96.3258	1132.55
96.4269	1160.27
96.528	1190.24
96.6291	1222.39
96.7302	1254.13
96.8313	1285.49
96.9324	1317.56
97.0335	1352.19
97.1346	1389.58
97.2356	1433.1
97.3367	1484.88
97.4378	1544.79
97.5389	1618.8
97.64	1706.04
97.7411	1799.31
97.8422	1897.57
97.9433	2000.91
98.0444	2107.38
98.1455	2217.14
98.2465	2326.65
98.3476	2429.27
98.4487	2524.13
98.5498	2599.03
98.6509	2662.98
98.752	2717.96
98.8531	2762.22
98.9542	2801.3
99.0553	2837.61
99.1563	2872.22
99.2574	2907.12
99.3585	2941.24
99.4596	2973.73
99.5607	3000.4
99.6618	3022.33
99.7629	3038.97
99.864	3044.57
99.9651	3045.54
100.066	3042.34
100.167	3036.31
100.268	3030.01
100.369	3023.15
100.471	3014.25
100.572	3004.41
100.673	2995.5
100.774	2990.68
100.875	2993.83
100.976	3001.43
101.077	3013.63
101.178	3026.09
101.279	3036.74
101.38	3044.95
101.481	3042.56
101.582	3033.05
101.684	3016.46
101.785	2988.91
101.886	2952.8
101.987	2908.32
102.088	2848.14
102.189	2774.48
102.29	2691.49
102.391	2597.52
102.492	2492.81
102.593	2381.33
102.694	2262.06
102.796	2138.35
102.897	2013.95
102.998	1889.4
103.099	1769.15
103.2	1654.27
103.301	1544.76
103.402	1442.68
103.503	1343.41
103.604	1246.7
103.705	1154.24
103.806	1063.99
103.908	975.804
104.009	891.041
104.11	815.956
104.211	747.783
104.312	688.169
104.413	634.639
104.514	584.958
104.615	539.321
104.716	502.395
104.817	470.835
104.918	444.591
105.02	426.564
105.121	408.798
105.222	390.362
105.323	367.504
105.424	341.988
105.525	315.674
105.626	290.314
105.727	268.593
105.828	249.147
105.929	232.292
106.03	218.94
106.132	207.857
106.233	199.169
106.334	196.049
106.435	195.878
106.536	198.207
106.637	199.558
106.738	198.355
106.839	194.913
106.94	188.131
107.041	179.053
107.142	169.469
107.244	161.238
107.345	155.07
107.446	150.04
107.547	146.185
107.648	143.56
107.749	139.417
107.85	133.08
107.951	122.711
108.052	113.215
108.153	104.775
108.254	98.7832
108.356	92.4454
108.457	85.8949
108.558	79.3646
108.659	73.0884
108.76	66.9477
108.861	60.8953
108.962	55.0295
109.063	49.307
109.164	43.7683
109.265	39.3468
109.366	36.5345
109.467	35.6391
109.569	40.854
109.67	47.6429
109.771	55.5341
109.872	60.7094
109.973	63.5825
110.074	64.691
110.175	64.0919
110.276	64.0234
110.377	65.64
110.478	71.5939
110.579	79.8921
110.681	84.7247
110.782	81.8038
110.883	66.8356
110.984	50.3897
111.085	33.9756
111.186	25.0428
111.287	19.7748
111.388	17.7582
111.489	16.8067
111.59	14.5779
111.691	11.4079
111.793	7.47496
111.894	4.00025
111.995	1.21297
112.096	-0.106235
112.197	0.00193677
112.298	1.4629
112.399	4.81452
112.5	11.7183
112.601	19.5297
112.702	27.9483
112.803	32.0359
112.905	32.9904
113.006	30.9941
113.107	26.3022
113.208	21.552
113.309	17.4182
113.41	16.6292
113.511	19.8698
113.612	24.7004
113.713	29.3385
113.814	29.7507
113.915	27.41
114.017	21.856
114.118	13.9054
114.219	6.89939
114.32	1.49163
114.421	0.662241
114.522	1.35961
114.623	3.35516
114.724	5.42625
114.825	6.46289
114.926	6.76499
115.027	6.57434
115.129	5.34393
115.23	3.25526
115.331	-0.0967558
115.432	-3.58369
115.533	-7.28519
115.634	-11.3284
115.735	-15.0104
115.836	-17.7374
115.937	-19.2923
116.038	-20.5705
116.139	-21.936
116.24	-23.4112
116.342	-25.2305
116.443	-26.6013
116.544	-27.1641
116.645	-25.0318
116.746	-21.4239
116.847	-17.2411
116.948	-13.1346
117.049	-9.68063
117.15	-7.27477
117.251	-6.53609
117.352	-9.46926
117.454	-12.7362
117.555	-15.8654
117.656	-14.435
117.757	-10.9296
117.858	-5.68926
117.959	-0.985774
118.06	2.58906
118.161	5.54699
118.262	8.87539
118.363	11.973
118.464	14.5522
118.566	15.9033
118.667	15.553
118.768	13.9203
118.869	10.6696
118.97	6.50168
119.071	2.58575
119.172	-0.868939
119.273	-1.4519
119.374	0.247596
119.475	4.03501
119.576	9.10562
119.678	13.4037
119.779	16.7666
119.88	17.8099
119.981	15.4943
120.082	11.6654
120.183	7.38503
120.284	7.82017
120.385	11.5029
120.486	19.0922
120.587	28.9229
120.688	37.241
120.79	43.2978
120.891	42.4188
120.992	39.7941
121.093	35.7579
121.194	32.2045
121.295	27.9638
121.396	22.8787
121.497	15.6742
121.598	8.97682
121.699	2.77727
121.8	-2.58023
121.902	-4.87999
122.003	-4.76696

## Sheet: Calculations
PPM	Intensity	Y/stdev	mean sub	Beta
90.0583	74.8018	0.0716755	-1.32019	0.269496	-0.355785	26.2632
90.1594	81.4441	0.0780402	-1.31382	0.270971	-0.356009
90.2605	86.5692	0.0829511	-1.30891	0.273172	-0.357558
90.3615	90.111	0.0863449	-1.30552	0.269347	-0.351638
90.4626	90.8223	0.0870265	-1.30484	0.267454	-0.348984			Bo	26.9228
90.5637	91.0246	0.0872203	-1.30464	0.263648	-0.343967
90.6648	91.3931	0.0875734	-1.30429	0.25961	-0.338607
90.7659	94.569	0.0906166	-1.30125	0.259501	-0.337675
90.867	99.6617	0.0954964	-1.29637	0.257042	-0.333221
90.9681	106.166	0.101729	-1.29013	0.252144	-0.3253
91.0692	114.475	0.109691	-1.28217	0.24667	-0.316274
91.1703	128.327	0.122964	-1.2689	0.243076	-0.308439
91.2714	145.238	0.139168	-1.2527	0.240285	-0.301004
91.3724	165.276	0.158368	-1.2335	0.229704	-0.283339
91.4735	184.592	0.176877	-1.21499	0.219361	-0.26652
91.5746	202.593	0.194126	-1.19774	0.210071	-0.25161
91.6757	218.942	0.209792	-1.18207	0.194749	-0.230208
91.7768	233.078	0.223337	-1.16853	0.174076	-0.203412
91.8779	248.219	0.237845	-1.15402	0.152766	-0.176295
91.979	264.878	0.253808	-1.13806	0.121787	-0.138601
92.0801	289.417	0.277321	-1.11454	0.0863806	-0.0962749
92.1812	320.271	0.306886	-1.08498	0.0503616	-0.0546413
92.2823	356.445	0.341548	-1.05032	0.0210456	-0.0221045
92.3833	399.412	0.382719	-1.00914	-0.00554753	0.00559826
92.4844	442.851	0.424342	-0.967521	-0.0368456	0.0356489
92.5855	485.667	0.465369	-0.926495	-0.0659388	0.061092
92.6866	525.901	0.503921	-0.887942	-0.0939561	0.0834276
92.7877	563.81	0.540246	-0.851617	-0.114356	0.0973877
92.8888	598.573	0.573556	-0.818307	-0.122564	0.100295
92.9899	628.304	0.602045	-0.789819	-0.12295	0.0971078
93.091	649.739	0.622584	-0.76928	-0.123069	0.0946745
93.1921	667.276	0.639388	-0.752476	-0.126761	0.0953847
93.2931	681.078	0.652613	-0.739251	-0.127906	0.0945544
93.3942	688.449	0.659676	-0.732188	-0.118812	0.0869926
93.4953	692.602	0.663655	-0.728208	-0.10835	0.0789016
93.5964	693.929	0.664927	-0.726937	-0.105189	0.076466
93.6975	695.384	0.666321	-0.725543	-0.102511	0.0743759
93.7986	698.173	0.668993	-0.72287	-0.0932611	0.0674157
93.8997	701.893	0.672558	-0.719306	-0.0903483	0.064988
94.0008	705.985	0.676479	-0.715385	-0.0952201	0.068119
94.1019	711.442	0.681708	-0.710156	-0.107642	0.0764427
94.203	718.674	0.688638	-0.703226	-0.109542	0.0770328
94.304	729.584	0.699092	-0.692772	-0.107569	0.0745209
94.4051	743.036	0.711981	-0.679882	-0.102122	0.0694306
94.5062	757.474	0.725816	-0.666048	-0.0960057	0.0639444
94.6073	772.525	0.740238	-0.651626	-0.100085	0.0652177
94.7084	786.821	0.753937	-0.637927	-0.10591	0.0675627
94.8095	800.085	0.766646	-0.625217	-0.108312	0.0677184
94.9106	812.096	0.778155	-0.613708	-0.105248	0.0645915
95.0117	825.171	0.790684	-0.60118	-0.105433	0.0633843
95.1128	840.363	0.805241	-0.586623	-0.109474	0.0642201
95.2139	857.723	0.821875	-0.569988	-0.112481	0.0641129
95.3149	878.403	0.841691	-0.550173	-0.119097	0.065524
95.416	900.588	0.862949	-0.528915	-0.128635	0.0680371
95.5171	924.386	0.885752	-0.506111	-0.135274	0.0684637
95.6182	951.719	0.911943	-0.479921	-0.138902	0.0666621
95.7193	980.624	0.93964	-0.452224	-0.141131	0.0638229
95.8204	1009.57	0.967376	-0.424488	-0.142871	0.0606471
95.9215	1036.55	0.993228	-0.398635	-0.140322	0.0559375
96.0226	1060.63	1.0163	-0.375562	-0.139009	0.0522065
96.1237	1083.84	1.03854	-0.353322	-0.141119	0.0498604
96.2247	1106.87	1.06061	-0.331254	-0.139165	0.0460989
96.3258	1132.55	1.08522	-0.306647	-0.133976	0.0410834
96.4269	1160.27	1.11178	-0.280086	-0.124755	0.0349422
96.528	1190.24	1.14049	-0.251369	-0.113846	0.0286172
96.6291	1222.39	1.1713	-0.220562	-0.102453	0.0225974
96.7302	1254.13	1.20171	-0.190149	-0.0950786	0.0180791
96.8313	1285.49	1.23176	-0.160099	-0.0906829	0.0145183
96.9324	1317.56	1.26249	-0.12937	-0.0757641	0.00980159
97.0335	1352.19	1.29568	-0.0961871	-0.0476932	0.00458748
97.1346	1389.58	1.3315	-0.0603598	-0.0143047	0.00086343
97.2356	1433.1	1.3732	-0.0186587	0.0200882	-0.000374819
97.3367	1484.88	1.42282	0.0309572	0.0584158	0.00180839
97.4378	1544.79	1.48023	0.0883633	0.102626	0.00906835
97.5389	1618.8	1.55114	0.15928	0.162325	0.0258552
97.64	1706.04	1.63474	0.242874	0.235626	0.0572274
97.7411	1799.31	1.72411	0.332246	0.326372	0.108436
97.8422	1897.57	1.81826	0.426399	0.436761	0.186235
97.9433	2000.91	1.91728	0.52542	0.549692	0.288819
98.0444	2107.38	2.0193	0.62744	0.64242	0.40308
98.1455	2217.14	2.12448	0.732613	0.711227	0.521054
98.2465	2326.65	2.22941	0.837546	0.773597	0.647923
98.3476	2429.27	2.32774	0.935877	0.831663	0.778335
98.4487	2524.13	2.41864	1.02677	0.882557	0.906186
98.5498	2599.03	2.49041	1.09854	0.927886	1.01932
98.6509	2662.98	2.55168	1.15982	0.961518	1.11519
98.752	2717.96	2.60437	1.2125	0.970491	1.17672
98.8531	2762.22	2.64678	1.25491	0.968498	1.21538
98.9542	2801.3	2.68422	1.29236	0.963179	1.24477
99.0553	2837.61	2.71901	1.32715	0.950841	1.26191
99.1563	2872.22	2.75218	1.36031	0.929425	1.26431
99.2574	2907.12	2.78562	1.39376	0.900643	1.25528
99.3585	2941.24	2.81831	1.42645	0.867608	1.2376
99.4596	2973.73	2.84945	1.45758	0.827717	1.20647
99.5607	3000.4	2.875	1.48314	0.78943	1.17083
99.6618	3022.33	2.89601	1.50415	0.75259	1.13201
99.7629	3038.97	2.91196	1.5201	0.716128	1.08858
99.864	3044.57	2.91732	1.52546	0.683597	1.0428
99.9651	3045.54	2.91825	1.52639	0.661816	1.01019
100.066	3042.34	2.91519	1.52332	0.640531	0.975737
100.167	3036.31	2.90941	1.51755	0.609487	0.924924
100.268	3030.01	2.90337	1.51151	0.557174	0.842174
100.369	3023.15	2.8968	1.50494	0.483075	0.726997
100.471	3014.25	2.88827	1.49641	0.379853	0.568415
100.572	3004.41	2.87884	1.48698	0.241906	0.359709
100.673	2995.5	2.87031	1.47844	0.0769068	0.113702
100.774	2990.68	2.86569	1.47382	-0.0842429	-0.124159
100.875	2993.83	2.86871	1.47684	-0.22779	-0.33641
100.976	3001.43	2.87599	1.48412	-0.359568	-0.533643
101.077	3013.63	2.88768	1.49581	-0.482579	-0.721849
101.178	3026.09	2.89962	1.50775	-0.598708	-0.902704
101.279	3036.74	2.90982	1.51796	-0.705493	-1.07091
101.38	3044.95	2.91769	1.52583	-0.80156	-1.22304
101.481	3042.56	2.9154	1.52354	-0.884902	-1.34818
101.582	3033.05	2.90629	1.51442	-0.954627	-1.44571
101.684	3016.46	2.89039	1.49853	-1.00562	-1.50696
101.785	2988.91	2.86399	1.47213	-1.03926	-1.52992
101.886	2952.8	2.82939	1.43753	-1.06606	-1.53249
101.987	2908.32	2.78677	1.39491	-1.08808	-1.51776
102.088	2848.14	2.7291	1.33724	-1.09048	-1.45823
102.189	2774.48	2.65852	1.26666	-1.07408	-1.3605
102.29	2691.49	2.579	1.18714	-1.04584	-1.24155
102.391	2597.52	2.48896	1.0971	-1.01347	-1.11188
102.492	2492.81	2.38863	0.996762	-0.973553	-0.970401
102.593	2381.33	2.2818	0.889941	-0.933563	-0.830816
102.694	2262.06	2.16752	0.775656	-0.886566	-0.68767
102.796	2138.35	2.04898	0.657116	-0.82641	-0.543047
102.897	2013.95	1.92978	0.537915	-0.762894	-0.410372
102.998	1889.4	1.81043	0.418571	-0.695936	-0.291298
103.099	1769.15	1.69521	0.303346	-0.626806	-0.190139
103.2	1654.27	1.58513	0.193268	-0.553392	-0.106953
103.301	1544.76	1.4802	0.0883346	-0.481378	-0.0425223
103.402	1442.68	1.38238	-0.0094791	-0.416713	0.00395006
103.503	1343.41	1.28726	-0.1046	-0.355086	0.0371421
103.604	1246.7	1.1946	-0.197268	-0.297228	0.0586337
103.705	1154.24	1.106	-0.285864	-0.240382	0.0687167
103.806	1063.99	1.01952	-0.372342	-0.194	0.0722345
103.908	975.804	0.935021	-0.456842	-0.147325	0.0673045
104.009	891.041	0.853801	-0.538063	-0.101313	0.0545128
104.11	815.956	0.781854	-0.61001	-0.0607618	0.0370653
104.211	747.783	0.71653	-0.675333	-0.025664	0.0173318
104.312	688.169	0.659408	-0.732456	0.00927985	-0.00679708
104.413	634.639	0.608115	-0.783749	0.0459045	-0.0359776
104.514	584.958	0.56051	-0.831353	0.0756568	-0.0628976
104.615	539.321	0.516781	-0.875083	0.0984695	-0.086169
104.716	502.395	0.481398	-0.910466	0.117546	-0.107022
104.817	470.835	0.451157	-0.940707	0.129592	-0.121908
104.918	444.591	0.42601	-0.965854	0.138535	-0.133805
105.02	426.564	0.408736	-0.983127	0.147453	-0.144965
	1043.62	1.39186
